# Supplementary material for: Impurity induced controlled growth of a NaGdF4 nanostructure by a core–shell approach
Source: Royal Society of Chemistry journal article supplement (doi:10.1039/c7ce00790f), 2017-01-01
Supplement: c7ce00790f1.pdf [file c7ce00790f1.pdf]

## Supporting Information

### Core-Shell Approach to Impurity Incorporation and Controlled Growth of a NaGdF<sub>4</sub> Nanostructure

Suli Wu\*, Xiaoqian Sun, Zhipeng Meng and Shufen Zhang<sup>a</sup>

<sup>a</sup> State Key Laboratory of Fine Chemicals, Dalian University of Technology, 2 Linggong Road, Dalian 116024, P.R. China

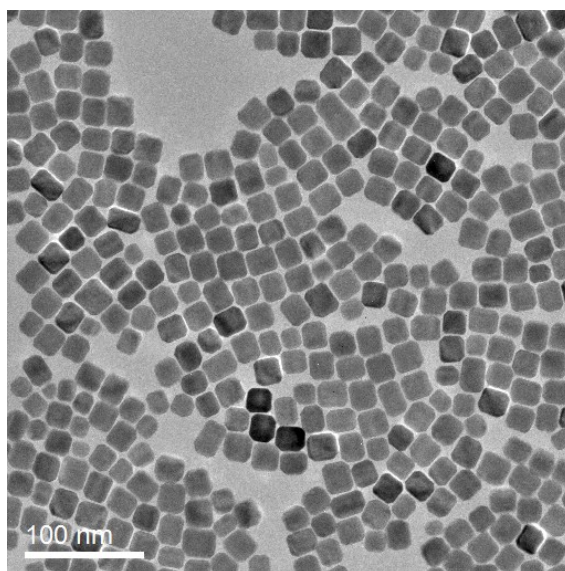

**Figure. S1** SEM image of NaGdF<sub>4</sub> nanoparticles without doping

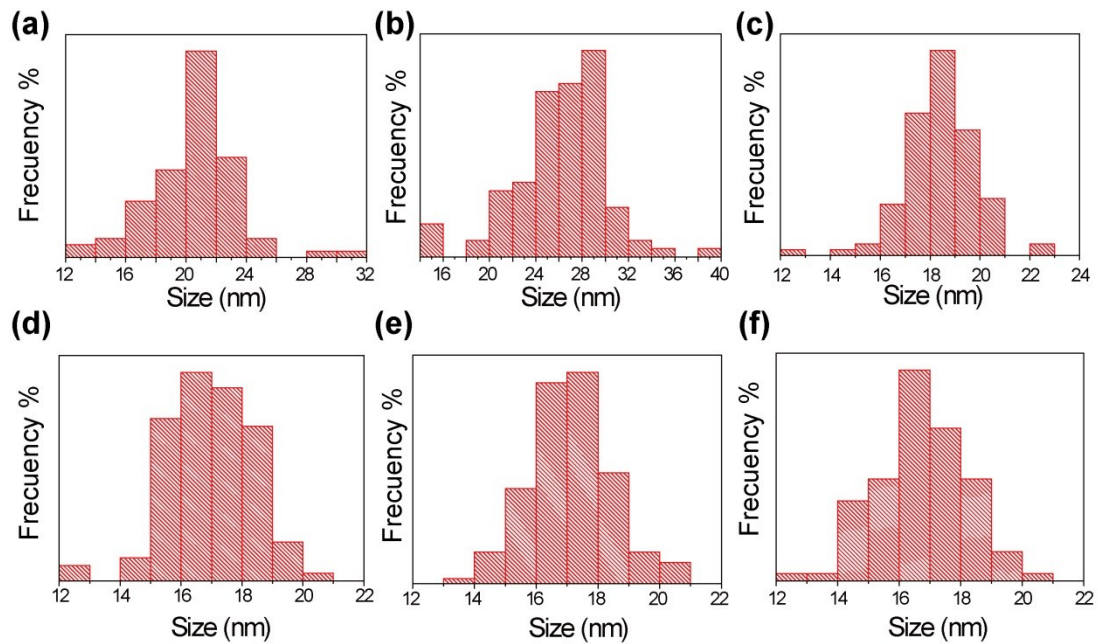

**Figure S2** The particle size distribution of NaGdF<sub>4</sub>:Cr core with different concentration of Cr(CF<sub>3</sub>COO)<sub>3</sub>: (a)50 %; (b)40 %; (c)30 %; (d)10 %; (e)5 %; (f)3 %.

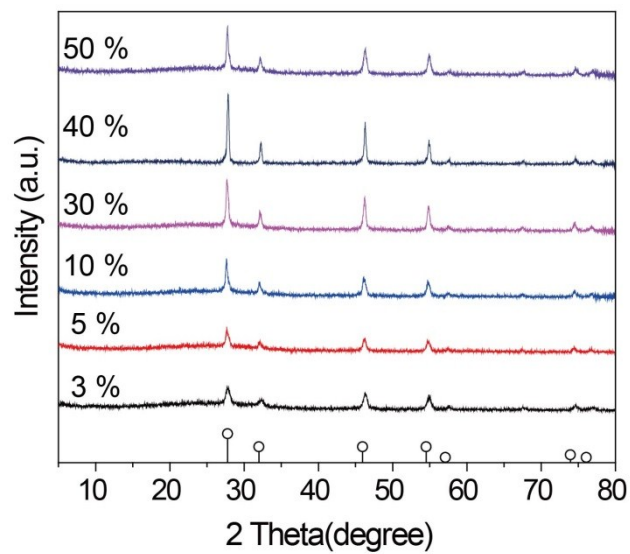

**Figure S3** XRD patterns of NaGdF<sub>4</sub>:Cr@NaGdF<sub>4</sub>:Yb/Tm core-shell nanoparticles with different concentration of Cr(CF<sub>3</sub>COO)<sub>3</sub> precursor in core preparation

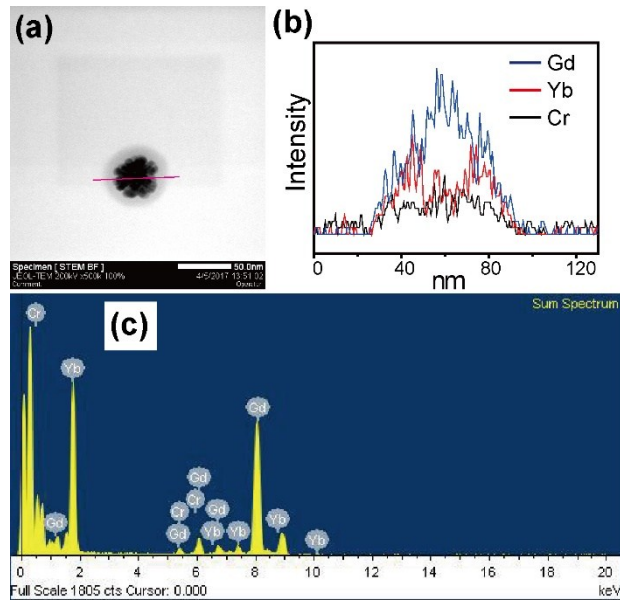

**Figure S4** The electron energy-loss spectroscopy (EELS) 2D elemental maps and line profiles (a,b) and EDS (c) of  $Gd^{3+}$ ,  $Yb^{3+}$  and  $Cr^{3+}$  in  $NaGdF_4:Cr(50\%)@NaGdF_4:Yb/Tm$  core-shell nanoparticles (the reaction time is 0.5 h).

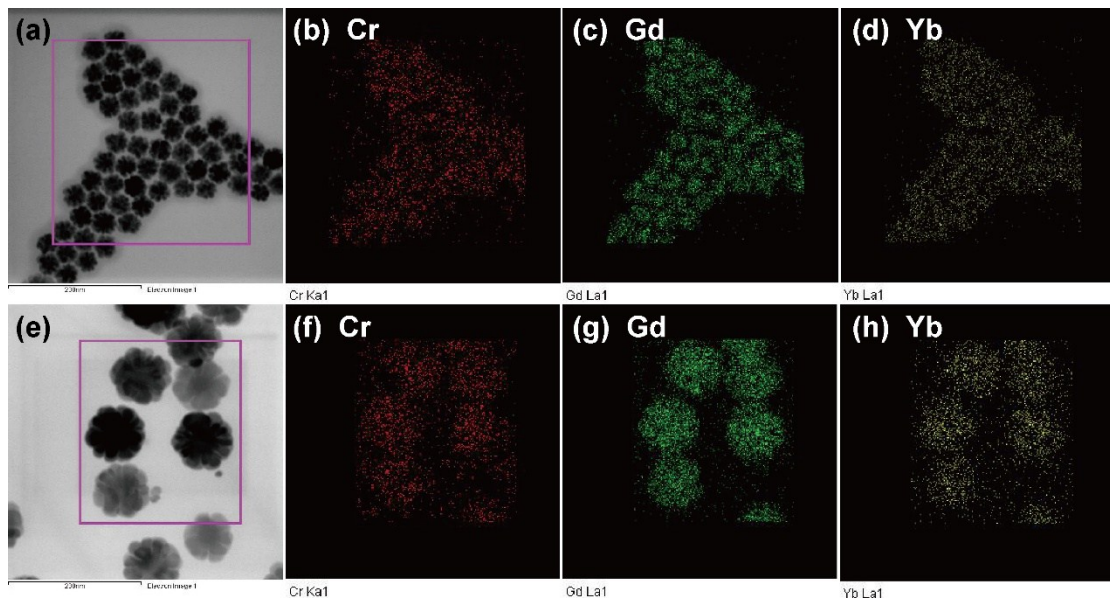

**Figure S5** TEM images and element mapping of Cr, Gd and Yb: (a)-(d)  $NaGdF_4:Cr@NaGdF_4:Yb,Tm$  UCNPs (0.5 h) and (e)-(h)  $NaGdF_4:Cr@NaGdF_4:Yb,Tm$  UCNPs (6 h).

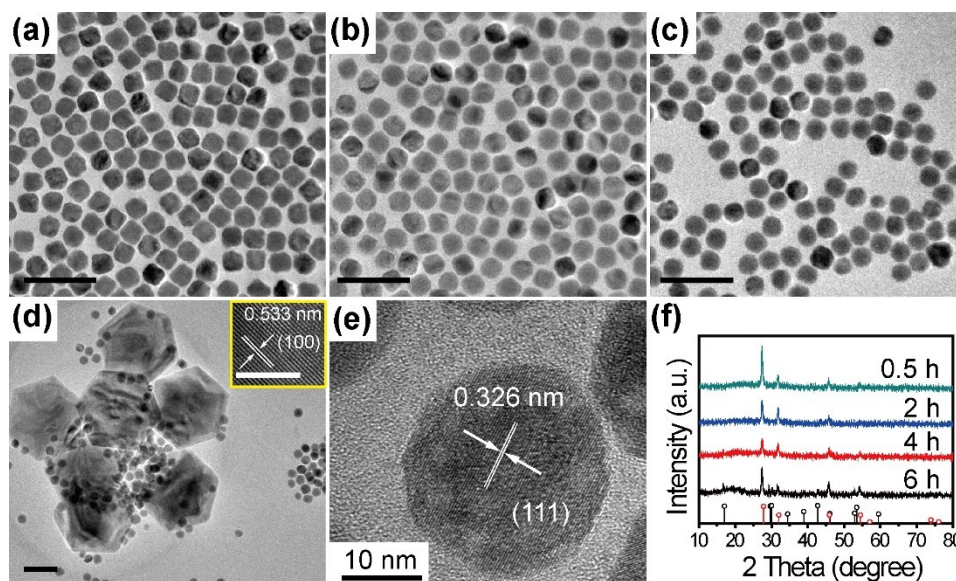

**Figure S6** The TEM images of NaGdF<sub>4</sub>@NaGdF<sub>4</sub>:Yb/Tm UCNPs prepared with different reaction time: (a)0.5 h; (b)2 h; (c)4 h; (d)6 h; (e)6 h. The XRD patterns (f) of NaGdF<sub>4</sub>@NaGdF<sub>4</sub>:Yb/Tm UCNPs. The scale bar in inset figure of (d) is 10 nm, while the other bars in (a)-(d) are all 100 nm.

**Table S1** The concentrations of Cr, Gd and Yb in NaGdF<sub>4</sub>:Cr@NaGdF<sub>4</sub>:Yb,Tm UCNPs

| NaGdF <sub>4</sub> :Cr@NaGdF <sub>4</sub> :Yb,Tm 0.5 h |         |         | NaGdF <sub>4</sub> :Cr@NaGdF <sub>4</sub> :Yb,Tm 6 h |          |          |
|--------------------------------------------------------|---------|---------|------------------------------------------------------|----------|----------|
| Element                                                | Weight% | Atomic% | Element                                              | Weight % | Atomic % |
| Cr K                                                   | 4.69    | 13.42   | Cr K                                                 | 4.61     | 13.11    |
| Gd L                                                   | 53.19   | 50.34   | Gd L                                                 | 63.87    | 60.00    |
| Yb L                                                   | 42.13   | 36.24   | Yb L                                                 | 31.51    | 26.90    |
